# Supplementary material for: Trans [OReV–OH] core stabilised by chelating N-heterocyclic dicarbene ligands
Source: Royal Society of Chemistry journal article supplement (doi:10.1039/c2dt31681a), 2012-11-07
Supplement: c2dt31681a.pdf [file c2dt31681a.pdf]

*Electronic Supplementary Information for*

# *Trans* [O=Re<sup>V</sup>-OH] Core Stabilised by Chelating N-Heterocyclic Dicarbene Ligands

*Regina Lum, Hu Zhang, Wenhua Zhang, Shi-Qiang Bai, Jin Zhao and T.S. Andy Hor\**

## CONTENTS

### 1. Experimental Section

### 2. X-ray crystallography

**Table S1** Summary of crystallographic data for complexes **1–3**.

**Table S2** Selected bond lengths (Å) and angles (°) for complexes **1–3**.

### 3. References

## 1. Experimental Section

### Synthesis of Ag(I) NHC complexes and characterisation

$L^{\text{Me}}\text{Br}_2$ ,  $L^{\text{iPr}}\text{Br}_2$ , and  $L^{\text{Bn}}\text{Br}_2$  were synthesized according to literature procedures<sup>1</sup> with modifications. To a solution of  $L^{\text{Me}}\text{Br}_2$ ,  $L^{\text{iPr}}\text{Br}_2$  or  $L^{\text{Bn}}\text{Br}_2$  (0.59 mmol) in  $\text{H}_2\text{O}$  (8.0 mL), two equivalent of  $\text{Ag}_2\text{O}$  (1.2 mmol) was added in the absence of light. The reaction was stirred at room temperature for  $L^{\text{Me}}\text{Br}_2$  and  $L^{\text{iPr}}\text{Br}_2$ , and at 50 °C for  $L^{\text{Bn}}\text{Br}_2$ , and stopped when the mixture turned brown. Excess  $\text{Ag}_2\text{O}$  was filtered and residue washed with  $\text{H}_2\text{O}$ . To the reddish brown filtrate, two equivalent of  $\text{NH}_4\text{PF}_6$  (1.2 mmol) was added and stirred. White precipitate in colourless solution was formed immediately. White precipitate was collected by filtration. The product was washed with  $\text{H}_2\text{O}$  and  $\text{Et}_2\text{O}$  and dried under vacuum. Light grey complexes  $\text{Ag}_2(\text{L}^{\text{Me}})_2(\text{PF}_6)_2$ ,  $\text{Ag}_2(\text{L}^{\text{iPr}})_2(\text{PF}_6)_2$ ,  $\text{Ag}_2(\text{L}^{\text{Bn}})_2(\text{PF}_6)_2$  were obtained.

$\text{Ag}_2(\text{L}^{\text{Me}})_2(\text{PF}_6)_2$ . Yield: 57%.  $^1\text{H}$  NMR ( $\text{DMSO}-d_6$ , 300MHz):  $\delta$ 7.866 and 7.860 (d, 1H,  $^3J=1.8\text{Hz}$ ,  $\text{CH}=\text{CH}$ ),  $\delta$ 7.532 and 7.526 (d, 1H,  $^3J=1.8\text{Hz}$ ,  $\text{CH}=\text{CH}$ ),  $\delta$ 6.61 (b, 1H,  $\text{NCH}_2\text{N}$ ),  $\delta$ 3.86 (s, 3H,  $\text{CH}_3$ ).  $^{13}\text{C}$  NMR ( $\text{DMSO}-d_6$ , 300MHz):  $\delta$ 124.37 ( $\text{CH}=\text{CH}$ ),  $\delta$ 121.71 ( $\text{CH}=\text{CH}$ ),  $\delta$ 63.14 ( $\text{NCH}_2\text{N}$ ),  $\delta$ 38.57 ( $\text{CH}_3$ ), imidazole NCN not observed.

$\text{Ag}_2(\text{L}^{\text{iPr}})_2(\text{PF}_6)_2$ . Yield: 72%.  $^1\text{H}$  NMR ( $\text{DMSO}-d_6$ , 300MHz):  $\delta$ 7.88 (s, 2H,  $\text{CH}=\text{CH}$ ),  $\delta$ 7.74 (s, 2H,  $\text{CH}=\text{CH}$ ),  $\delta$ 6.55 (b, 2H,  $\text{NCH}_2\text{N}$ ),  $\delta$ 4.61-4.74 (septet, 2H,  $^3J=6.54\text{Hz}$ ,  $\text{CH}(\text{CH}_3)_2$ ),  $\delta$ 1.44 and 1.42 (d, 12H,  $^3J=6.75\text{Hz}$ ,  $\text{CH}_3$ ).  $^{13}\text{C}$  NMR ( $\text{DMSO}-d_6$ , 300MHz):  $\delta$ 122.20 ( $\text{CH}=\text{CH}$ ),  $\delta$ 120.03 ( $\text{CH}=\text{CH}$ ),  $\delta$ 63.86 ( $\text{NCH}_2\text{N}$ ),  $\delta$ 54.47 ( $\text{CH}(\text{CH}_3)_2$ ),  $\delta$ 23.35 ( $\text{CH}_3$ ), imidazole NCN not observed.

$\text{Ag}_2(\text{L}^{\text{Bn}})_2(\text{PF}_6)_2$ . Yield: 64%.  $^1\text{H}$  NMR ( $\text{DMSO}-d_6$ , 400MHz):  $\delta$ 7.88 (s, 1H,  $\text{CH}=\text{CH}$ ),  $\delta$ 7.60 (s, 1H,  $\text{CH}=\text{CH}$ ),  $\delta$ 7.28- 7.23 (m, 5H, Ph),  $\delta$ 7.07 (s, 1H,  $\text{NCH}_2\text{N}$ ),  $\delta$ 5.21 (s, 2Hs,  $\text{NCH}_2\text{Ph}$ ).  $^{13}\text{C}$  NMR ( $\text{DMSO}-d_6$ , 100MHz):  $\delta$ 128.99- $\delta$ 127.13 (Ph),  $\delta$ 123.55 ( $\text{CH}=\text{CH}$ ),  $\delta$ 122.40 ( $\text{CH}=\text{CH}$ ),  $\delta$ 63.59 ( $\text{NCH}_2\text{N}$ ),  $\delta$ 54.48 ( $\text{CHPh}$ ), imidazole NCN not observed.

### Synthesis of complexes 1-3

$\text{Ag}_2\text{L}_2(\text{PF}_6)_2$  (0.05 mmol) ( $\text{L} = \text{L}^{\text{Me}}$ ,  $\text{L}^{\text{iPr}}$ , or  $\text{L}^{\text{Bn}}$ ) was added to a  $\text{CH}_3\text{CN}$  solution (10.0 mL) of  $\text{ReOCl}_3(\text{PPh}_3)_2$  (0.05 mmol).<sup>2</sup> The suspension turned from green-yellow to dirty green and then brown in 20 min. The mixture was stirred for 2 h, then  $\text{AgCl}$  was filtered off. The reddish brown filtrate was evaporated to dryness under reduced pressure. The crude product was washed with toluene, ethyl acetate and  $\text{Et}_2\text{O}$  to yield  $[\text{ReO}(\text{OH})(\text{L}^{\text{Me}})_2](\text{PF}_6)(\text{ReO}_4)$  (**1**),  $[\text{ReO}(\text{OH})(\text{L}^{\text{iPr}})_2](\text{PF}_6)(\text{ReO}_4)$  (**2**) or  $[\text{ReO}(\text{OH})(\text{L}^{\text{Bn}})_2](\text{PF}_6)(\text{ReO}_4)$  (**3**).

$[\text{ReO}(\text{OH})(\text{L}^{\text{Me}})_2](\text{PF}_6)_{1.4}(\text{ReO}_4)_{0.6}$  (**1**): Yield: 92%. ESI-MS:  $m/z=286.14$  (100%,  $[\text{ReO}(\text{OH})(\text{L}^{\text{Me}})_2]^{2+}$ ).  $^1\text{H}$  NMR ( $\text{DMSO}-d_6$ , 400MHz):  $\delta$ 7.93 (s, 2H,  $\text{CH}=\text{CH}$ ),  $\delta$ 7.92 (s, 2H,  $\text{CH}'=\text{CH}$ ),  $\delta$ 7.76 (s, 2H,  $\text{CH}=\text{CH}$ ),  $\delta$ 7.67 (s, 2H,  $\text{CH}=\text{CH}'$ ),  $\delta$ 6.76 (s, 2H,  $\text{NCH}_2\text{N}$ ),  $\delta$ 6.71 (s, 2H,  $\text{NCH}'_2\text{N}$ ),  $\delta$ 3.77 (s, 6H,  $\text{CH}_3$ ),  $\delta$ 3.55 (s, 6H,  $\text{CH}'_3$ ).  $^{13}\text{C}$  NMR ( $\text{DMSO}-d_6$ , 100MHz):  $\delta$ 168.42 (Re-C),  $\delta$ 166.68 (Re-C'),  $\delta$ 125.23 ( $\text{CH}=\text{CH}$ ),  $\delta$ 124.53 ( $\text{C}'\text{H}=\text{CH}$ ),  $\delta$ 123.50 ( $\text{CH}=\text{CH}$ ),  $\delta$ 122.76 ( $\text{CH}=\text{C}'\text{H}$ ),

$\delta$ 63.91 (NCH<sub>2</sub>N),  $\delta$ 62.97 (NC'H<sub>2</sub>N),  $\delta$ 37.43 (CH<sub>3</sub>),  $\delta$ 36.55 (C'H<sub>3</sub>). FTIR (400-4000cm<sup>-1</sup>, KBr): 3442cm<sup>-1</sup> (OH), 960cm<sup>-1</sup> (Re=O), 923cm<sup>-1</sup> (ReO<sub>4</sub><sup>-</sup>), 842 and 559cm<sup>-1</sup> (PF<sub>6</sub><sup>-</sup>). Analytical calculation for C<sub>18</sub>H<sub>25</sub>N<sub>8</sub>O<sub>4.42</sub>P<sub>1.40</sub>F<sub>8.38</sub>Re<sub>1.61</sub>, C: 23.49, H: 2.73, N: 12.17 %. Found, C: 22.27, H: 2.47, N: 11.55 %.

**[ReO(OH)(L<sup>iPr</sup>)<sub>2</sub>](PF<sub>6</sub>)<sub>1.4</sub>(ReO<sub>4</sub>)<sub>0.6</sub> (2):** Yield: 96%. ESI-MS:  $m/z = 342.07$  (90%, [ReO(OH)(L<sup>iPr</sup>)<sub>2</sub>]<sup>2+</sup>). <sup>1</sup>H NMR (DMSO-d<sub>6</sub>, 400MHz):  $\delta$ 7.94 (s, 2H, CH=CH),  $\delta$ 7.87 (s, 2H, CH=CH),  $\delta$ 6.71 (s, 2H, NCH<sub>2</sub>N),  $\delta$ 4.46 (s, 1H, CH(CH<sub>3</sub>)<sub>2</sub>),  $\delta$ 4.21 (s, 1H, CH'(CH<sub>3</sub>)<sub>2</sub>),  $\delta$ 1.55 and  $\delta$ 1.49 (d, 6H, CH<sub>3</sub>),  $\delta$ 1.00 and  $\delta$ 0.97 (d, 6H, CH'<sub>3</sub>). <sup>13</sup>C NMR (DMSO-d<sub>6</sub>, 100MHz):  $\delta$ 167.54 (Re-C),  $\delta$ 123.75 (CH=CH),  $\delta$ 118.73 (CH=CH),  $\delta$ 63.38 (NCH<sub>2</sub>N),  $\delta$ 52.62 (CH(CH<sub>3</sub>)<sub>2</sub>),  $\delta$ 51.92 (C'H(CH<sub>3</sub>)<sub>2</sub>),  $\delta$ 22.34 (CH<sub>3</sub>),  $\delta$ 21.60 (C'H<sub>3</sub>). FTIR (400-4000cm<sup>-1</sup>, KBr): 3438cm<sup>-1</sup> (OH), 963cm<sup>-1</sup> (Re=O), 913cm<sup>-1</sup> (ReO<sub>4</sub><sup>-</sup>), 842 and 558cm<sup>-1</sup> (PF<sub>6</sub><sup>-</sup>). Analytical calculation for C<sub>26</sub>H<sub>41</sub>N<sub>8</sub>O<sub>4.37</sub>P<sub>1.41</sub>F<sub>8.44</sub>Re<sub>1.59</sub>, C: 30.15, H: 3.99, N: 10.81 %. Found, C: 30.70, H: 3.83, N: 10.63 %.

**[ReO(OH)(L<sup>Bn</sup>)<sub>2</sub>](PF<sub>6</sub>)<sub>1.3</sub>(ReO<sub>4</sub>)<sub>0.7</sub> (3):** ESI-MS:  $m/z = 875.27$  (100%, [ReO<sub>2</sub>(L<sup>Bn</sup>)<sub>2</sub>]<sup>+</sup>).

## X-ray crystallography

Crystallographic measurements were made on a Bruker AXS APEX diffractometer by using graphite-monochromated Mo K $\alpha$  ( $\lambda = 0.71073 \text{ \AA}$ ). The data were corrected for Lorentz and polarization effects with the SMART suite of programs and for absorption effects with SADABS.<sup>3</sup> All crystal structures were solved by direct methods and refined on  $F^2$  by full-matrix least-squares techniques with SHELXTL-97 program.<sup>4</sup> In **1** and **3** the occupancy factors for disordered [PF<sub>6</sub>]/[ReO<sub>4</sub>] were refined to be 0.70/0.30 and 0.65/0.35 respectively. The H atoms on the OH group were found from difference Fourier map but treated with disordered model with their occupancy factors fixed at 0.50 and O–H bond lengths restrained at 0.85  $\text{\AA}$  while allowing their thermal parameters to be refined freely. For complex **2**, the occupancy factors for the two disordered [PF<sub>6</sub>]/[ReO<sub>4</sub>] pairs were refined to be 0.66/0.34 and 0.75/0.25. The H atom from the OH group were located from difference Fourier map with O–H bond lengths restrained at 0.82  $\text{\AA}$  and thermal parameters ( $U_{\text{iso(H)}}=1.2U_{\text{eq(O)}}$ ). All non-hydrogen atoms were refined anisotropically. All other hydrogen atoms were calculated in ideal geometries and refined isotropically. A summary of the key crystallographic data for complexes **1–3** are listed in Table S1 and their selected bond distances and angles are listed in Table S2.

**Table S1** Summary of key crystallographic data for complexes **1–3**.

| Complex                                             | <b>1</b>                                                                                                                | <b>2</b>                                                                                                                | <b>3</b>                                                                                                             |
|-----------------------------------------------------|-------------------------------------------------------------------------------------------------------------------------|-------------------------------------------------------------------------------------------------------------------------|----------------------------------------------------------------------------------------------------------------------|
| Empirical formula                                   | C <sub>22</sub> H <sub>31</sub> F <sub>8.38</sub> N <sub>10</sub> O <sub>4.42</sub> P <sub>1.4</sub> Re <sub>1.61</sub> | C <sub>26</sub> H <sub>41</sub> F <sub>8.44</sub> N <sub>8</sub> O <sub>4.37</sub> P <sub>1.41</sub> Re <sub>1.59</sub> | C <sub>50</sub> H <sub>53</sub> F <sub>7.8</sub> N <sub>12</sub> O <sub>4.8</sub> P <sub>1.3</sub> Re <sub>1.7</sub> |
| Formula weight                                      | 1007.78                                                                                                                 | 1024.92                                                                                                                 | 1378.79                                                                                                              |
| Temperature (K)                                     | 223(2)                                                                                                                  | 293(2)                                                                                                                  | 223(2)                                                                                                               |
| Wavelength (Å)                                      | 0.71073                                                                                                                 | 0.71073                                                                                                                 | 0.71073                                                                                                              |
| Crystal system                                      | Triclinic                                                                                                               | Monoclinic                                                                                                              | Monoclinic                                                                                                           |
| Space group                                         | <i>P</i> $\bar{1}$                                                                                                      | <i>P</i> 2 <sub>1</sub>                                                                                                 | <i>P</i> 2 <sub>1</sub> /n                                                                                           |
| Unit cell dimensions                                |                                                                                                                         |                                                                                                                         |                                                                                                                      |
| <i>a</i> (Å)                                        | 8.3330(5)                                                                                                               | 9.043(1)                                                                                                                | 11.6582(6)                                                                                                           |
| <i>b</i> (Å)                                        | 9.7967(6)                                                                                                               | 17.836(2)                                                                                                               | 11.1157(6)                                                                                                           |
| <i>c</i> (Å)                                        | 11.5140(7)                                                                                                              | 11.784(1)                                                                                                               | 22.029(1)                                                                                                            |
| $\alpha$ (°)                                        | 112.133(1)                                                                                                              |                                                                                                                         |                                                                                                                      |
| $\beta$ (°)                                         | 97.526(1)                                                                                                               | 110.328(3)                                                                                                              | 102.791 (1)                                                                                                          |
| $\gamma$ (°)                                        | 101.004(1)                                                                                                              |                                                                                                                         |                                                                                                                      |
| Volume (Å <sup>3</sup> )                            | 833.13(9)                                                                                                               | 1782.1(3)                                                                                                               | 2783.9(3)                                                                                                            |
| <i>Z</i>                                            | 1                                                                                                                       | 2                                                                                                                       | 2                                                                                                                    |
| Density (calculated, Mg/m <sup>3</sup> )            | 2.008                                                                                                                   | 1.931                                                                                                                   | 1.645                                                                                                                |
| Absorption coefficient (mm <sup>-1</sup> )          | 5.996                                                                                                                   | 5.555                                                                                                                   | 3.815                                                                                                                |
| F(000)                                              | 484.8                                                                                                                   | 1001                                                                                                                    | 1385.2                                                                                                               |
| Crystal size (mm <sup>3</sup> )                     | 0.50 × 0.24 × 0.20                                                                                                      | 0.50 × 0.34 × 0.20                                                                                                      | 0.18 × 0.12 × 0.10                                                                                                   |
| $\theta$ range for data collection (°)              | 1.96–27.50                                                                                                              | 2.17–24.99                                                                                                              | 1.83–27.50                                                                                                           |
| Reflections collected                               | 10815                                                                                                                   | 10532                                                                                                                   | 19182                                                                                                                |
| Independent reflections                             | 3821 [ <i>R</i> <sub>int</sub> = 0.0308]                                                                                | 6224 [ <i>R</i> <sub>int</sub> = 0.0275]                                                                                | 6379 [ <i>R</i> <sub>int</sub> = 0.0523]                                                                             |
| Data/restraints/parameters                          | 3821 / 66 / 267                                                                                                         | 6224 / 126 / 515                                                                                                        | 6379 / 239 / 380                                                                                                     |
| Goodness of fit on F <sup>2</sup>                   | 1.243                                                                                                                   | 1.270                                                                                                                   | 1.108                                                                                                                |
| Final <i>R</i> indices [ <i>I</i> > 2σ( <i>I</i> )] | <i>R</i> <sub>1</sub> = 0.0386, w <i>R</i> <sub>2</sub> = 0.0915                                                        | <i>R</i> <sub>1</sub> = 0.0444, w <i>R</i> <sub>2</sub> = 0.1039                                                        | <i>R</i> <sub>1</sub> = 0.0611, w <i>R</i> <sub>2</sub> = 0.1285                                                     |
| <i>R</i> indices (all data)                         | <i>R</i> <sub>1</sub> = 0.0407, w <i>R</i> <sub>2</sub> = 0.0925                                                        | <i>R</i> <sub>1</sub> = 0.0450, w <i>R</i> <sub>2</sub> = 0.1042                                                        | <i>R</i> <sub>1</sub> = 0.0827, w <i>R</i> <sub>2</sub> = 0.1373                                                     |
| Largest diff. peak and hole (e.Å <sup>-3</sup> )    | 1.248 and -1.356                                                                                                        | 1.662 and -1.299                                                                                                        | 1.759 and -0.981                                                                                                     |

**Table S2** Selected bond distances (Å) and angles (°) for complexes **1–3**.

|                    | <b>1</b> | <b>2</b> | <b>3</b> |
|--------------------|----------|----------|----------|
| Re(1)-O(1)         | 1.946(4) | 1.779(6) | 1.813(4) |
| Re(1)-O(2)         |          | 1.831(7) |          |
| Re(1)-C(1)         | 2.155(5) | 2.17(1)  | 2.166(7) |
| Re(1)-C(5)         | 2.154(4) | 2.167(9) |          |
| Re(1)-C(14)        |          | 2.164(9) |          |
| Re(1)-C(18)        |          | 2.19(1)  |          |
| Re(1)-C(12)        |          |          | 2.166(7) |
| O(1)-Re(1)-O(1A)   | 180.0(2) |          | 180      |
| O(1)-Re(1)-O(2)    |          | 179.6(3) |          |
| O(1)-Re(1)-C(1)    | 87.7(2)  | 90.5(3)  | 90.0(2)  |
| O(1)-Re(1)-C(1A)   | 92.3(2)  |          | 90.0(2)  |
| O(1)-Re(1)-C(5)    | 89.4(2)  | 90.4(3)  |          |
| O(1)-Re(1)-C(5A)   | 90.6(2)  |          |          |
| O(1)-Re(1)-C(12)   |          |          | 90.7(2)  |
| O(1)-Re(1)-C(12A)  |          |          | 89.3(2)  |
| O(1)-Re(1)-C(14)   |          | 91.4(3)  |          |
| O(1)-Re(1)-C(18)   |          | 89.6(4)  |          |
| O(2)-Re(1)-C(1)    |          | 89.5(4)  |          |
| O(2)-Re(1)-C(5)    |          | 89.2(3)  |          |
| O(2)-Re(1)-C(14)   |          | 89.0(3)  |          |
| O(2)-Re(1)-C(18)   |          | 90.4(4)  |          |
| C(5)-Re(1)-C(1)    | 81.4(2)  | 80.1(3)  |          |
| C(5)-Re(1)-C(1A)   | 98.6(2)  |          |          |
| C(5)-Re(1)-C(18)   |          | 100.1(3) |          |
| C(14)-Re(1)-C(1)   |          | 99.1(4)  |          |
| C(14)-Re(1)-C(18)  |          | 80.7(4)  |          |
| C(1)-Re(1)-C(12)   |          |          | 81.3(2)  |
| C(1)-Re(1)-C(12A)  |          |          | 98.7(2)  |
| C(5A)-Re(1)-C(5)   | 180      |          |          |
| C(1A)-Re(1)-C(1)   | 180      |          | 180      |
| C(5)-Re(1)-C(14)   |          | 178.0(4) |          |
| C(1)-Re(1)-C(18)   |          | 179.8(4) |          |
| C(12A)-Re(1)-C(12) |          |          | 180.0(3) |

Symmetry code A for complex **1**, 1-x, 1-y, -z; for complex **3**: -x, 2-y, -z.

## References

1. C. A. Quezada, J. C. Garrison, M. J. Panzner, C. A. Tessier and W. J. Youngs, *Organometallics*, 2004, **23**, 4846-4848.
2. N. P. Johnson, C. J. L. Lock, G. Wilkinson, J. L. Booker, and R. J. Thompson, in *Inorganic Syntheses*, John Wiley & Sons, Inc., 1967, pp. 145-148.
3. Sheldrick, G. M. SADABS. Program for empirical absorption correction of area detector data, University of Göttingen, Germany (1996).
4. SHELXS-97 and SHELXL-97. Programs for crystal structure solution and refinement. University of Göttingen, Germany (1997).
